# Supplementary material
Source: PubMed Central journal article supplement (PMC5451229)
Supplement: jci-127-92217-s001.pdf [file jci-127-92217-s001.pdf]

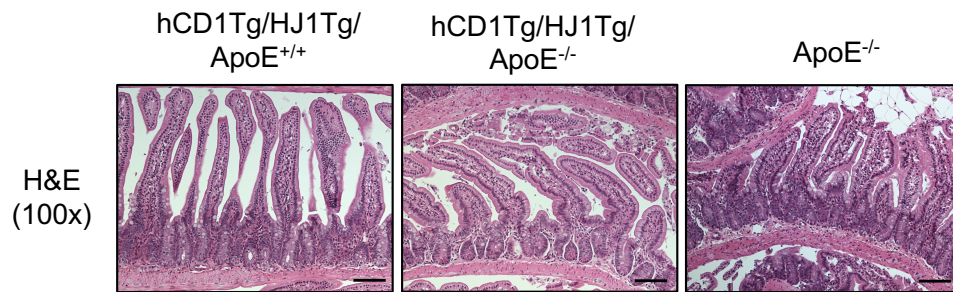

**Supplementary Figure 1. No obvious pathology is observed in the colon of diseased hCD1Tg/HJ1Tg/ApoE<sup>-/-</sup> mice.** Colon samples were fixed in 10% formalin and laid out in Swiss rolls for paraffin embedding. Paraffin sections were cut and stained with H&E to examine the tissue architecture. Scale bars represent 100  $\mu$ m.

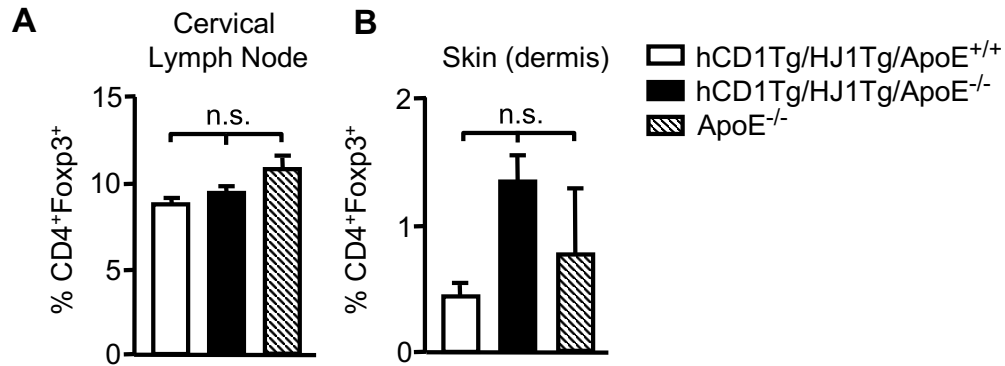

**Supplementary Figure 2. hCD1Tg/HJ1Tg/ApoE<sup>+/+</sup> and hCD1Tg/HJ1Tg/ApoE<sup>-/-</sup> mice have comparable numbers of FoxP3<sup>+</sup> regulatory T cells.** Cells isolated from the (A) cervical lymph nodes and (B) dermis were stained intracellularly with Foxp3 and gated on CD45<sup>+</sup>TCRb<sup>+</sup>. Subsequently, the CD4 and Foxp3 positive Treg cell population was examined (n=3-5). \*\*\* $P < 0.005$ ; \*\* $P < 0.01$ ; \* $P < 0.05$ ; n.s. = not significant. Statistical analysis was performed using One-Way ANOVA followed by Bonferroni post-hoc test.

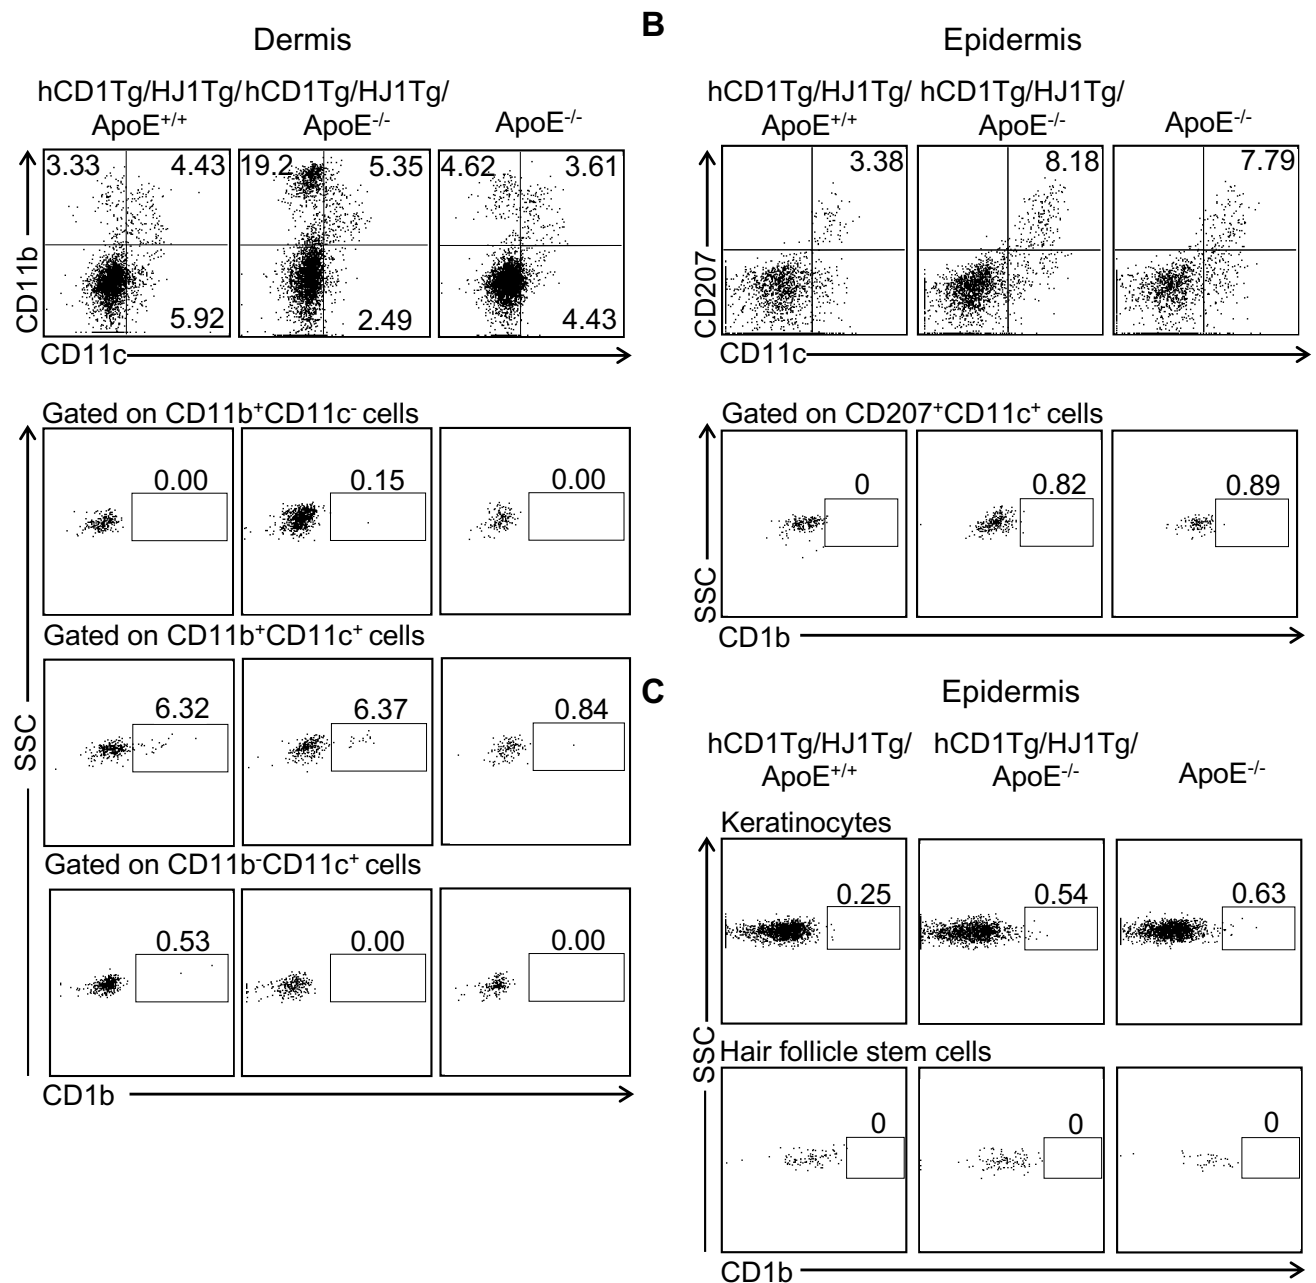

**Supplementary Figure 3. CD1b is expressed on a subset of dermal dendritic cells.** (A) Dermal cells were isolated and stained with mAbs against CD45, CD11b, CD11c, and CD1b. CD1b expression on CD11b<sup>+</sup>CD11c<sup>-</sup>, CD11b<sup>+</sup>CD11c<sup>+</sup> and CD11b<sup>-</sup>CD11c<sup>+</sup> populations was analyzed by flow cytometry. (B) Epidermal cells were isolated and stained with mAbs against CD45, CD207, CD11c and CD1b. CD1b expression on CD207<sup>+</sup>CD11c<sup>+</sup> population (Langerhans cells) was analyzed by flow cytometry by gating on CD45<sup>+</sup> cells. (C) CD1b expression on hair follicle stem cells and keratinocytes was determined by gating on CD45<sup>-</sup> cells and then on integrin  $\alpha$ 6 and  $\beta$ 1 double positive cells. Subsequently, CD34<sup>+</sup> Sca-1<sup>-</sup> hair follicle stem cells or CD34<sup>-</sup> Sca-1<sup>+</sup> epidermal keratinocytes were output for CD1b expression. Data shown are representative of at least 2 experiments for all figure panels.

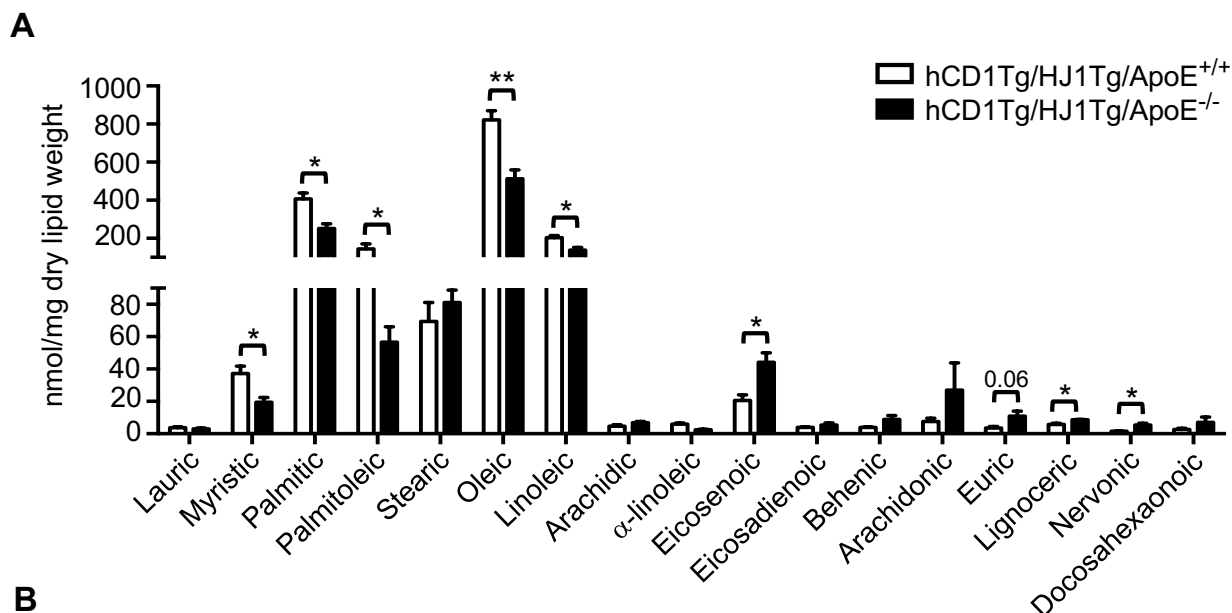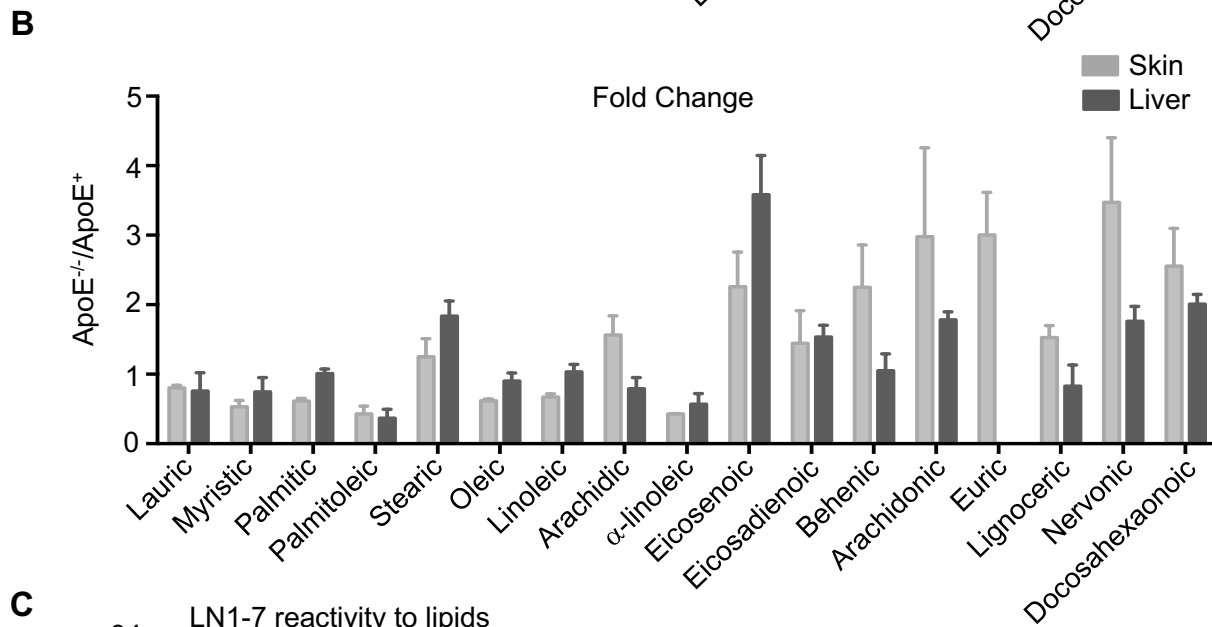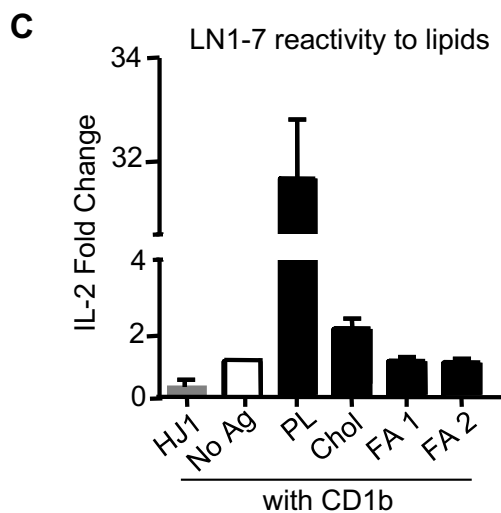

**Supplementary Figure 4. Fatty acids do not show preferential accumulation in the skin of hCD1Tg/HJ1Tg/ApoE<sup>-/-</sup> mice and reactivity of lipids to a second mouse CD1b-autoreactive hybridoma.** Total lipid was extracted from skin and liver tissues of indicated mice, weighed and analyzed by gas chromatography. (A) Fatty acid species in the skin of diseased hCD1Tg/HJ1Tg/ApoE<sup>-/-</sup> and healthy hCD1Tg/HJ1Tg/ApoE<sup>+/+</sup> mice (n=3) were quantified. (B) Ratio of fatty acids from diseased over healthy mice in the skin and liver. (C) Polar phospholipids (PL), cholesterol (Chol) and fatty acid mixtures (FA1: saturated and monounsaturated and FA2: polyunsaturated) were loaded on to CD1b protein and incubated with LN1-7 T cell hybridoma for 24 h. IL-2 in the supernatant was measured by ELISA. Data are representative of at least 2 experiments. \*\* $P < 0.01$ ; \* $P < 0.05$ . Statistical analysis was performed using Student's t-test.

Supplementary table 1: Oligonucleotide primers used in the study

| Name                  | Sequence (5'-3')                |
|-----------------------|---------------------------------|
| <b>For genotyping</b> |                                 |
| HJ1 $\alpha$ F        | TGACACCTGCTCAGTTCTTGTGC         |
| HJ1 $\alpha$ R        | TAGCTTGTTCCCTGCACTTGG           |
|                       |                                 |
| CD1c F                | CAGAACTGCAGAAACAGCA             |
| CD1c R                | GATGGGTGAAAAGAGGTGAAA           |
|                       |                                 |
| ApoE WT               | TGTGACTTGGGAGCTCTGCAGC          |
| ApoE Common           | GCCTAGCCGAGGGAGAGCCG            |
| ApoE Mutant           | GCCGCCCGACTGCATCT               |
|                       |                                 |
| <b>For RT-PCR</b>     |                                 |
| IL-18R $\alpha$ F     | TCACCGATCACAAATTCATGTGG         |
| IL-18R $\alpha$ R     | TGGTGGCTGTTTCATTCTGT            |
|                       |                                 |
| IL-12R $\beta$ 1 F    | TGCCGCTACTTCTCCTCAG             |
| IL-12R $\beta$ 1 R    | ACTTCATGGTTCGGTTCCCAA           |
|                       |                                 |
| TLR9 F                | ATGGTTCTCCGTCGAAGGACT           |
| TLR9 R                | GAGGCTTCAGCTCACAGGG             |
|                       |                                 |
| S100a7 F              | GTA CTC AGG TCA TGG TTC TG      |
| S100a7 R              | GGT ATT CAA GCA AGG TAT CAC     |
|                       |                                 |
| S100a8 F              | GGA GTT CCT TGC GAT GGT GAT     |
| S100a8 R              | TCC TTG TGG CTG TCT TTG TGA     |
|                       |                                 |
| $\beta$ -actin F      | CTT CTT TGC AGC TCC TTC GTT     |
| $\beta$ -actin R      | AGG AGT CCT TCT GAC CCA TTC     |
|                       |                                 |
| IL-17F F              | TGC TAC TGT TGA TGT TGG GAC     |
| IL-17F R              | AAT GCC CTG GTT TTG GTT GAA     |
|                       |                                 |
| IL-17A F              | ACT TTC AGG GTC GAG AAG A       |
| IL-17A R              | TTC TGA ATC TGC CTC TGA AT      |
|                       |                                 |
| IL-22 F               | ATG AGT TTT TCC CTT ATG GGG AC  |
| IL-22 R               | GCT GGA AGT TGG ACA CCT CAA     |
|                       |                                 |
| GM-CSF F              | GGC CTT GGC AGC ATG TAG AGC     |
| GM-CSF R              | GGA GAA CTC GTT AGA GAC GAC TT  |
|                       |                                 |
| TNF- $\alpha$ F       | CCA CCA CGC TCT TCT GTC T       |
| TNF- $\alpha$ R       | GGC ACC ACT AGT TGG TTG T       |
|                       |                                 |
| IL-6 F                | CTT GGG ACT GAT GCT GGT GAC A   |
| IL-6 R                | GCC TCC GAC TTG TGA AGT GGT A   |
|                       |                                 |
| TG $\beta$ 1 F        | CTC CCG TGG CTT CTA GTG C       |
| TG $\beta$ 1 R        | GGCC TTA GTT TGG ACA GGA TCT G  |
|                       |                                 |
| IL-4 F                | AAC TCC ATG CTT GAA GAA GAA CTC |
| IL-4 R                | CCA GGA AGT CTT TCA GTG ATG TG  |
|                       |                                 |
| IL-23 F               | CCA TTA GGA CTT GTG CTG TTC T   |
| IL-23 R               | CCA AGG GCT CGA GAC TTT ATT C   |
|                       |                                 |
| IFN- $\gamma$ F       | TCA AGT GGC ATA GAT GTG GAA GAA |
| IFN- $\gamma$ R       | TGG CTC TGC AGG ATT TTC ATG     |
|                       |                                 |
| HJ1V $\beta$ F        | ATC TCT TCC CGG TGC TGA TT      |
| HJ1V $\beta$ R        | TCT GGT TCC TGA GCC AAA AT      |
